# Supplementary material for: Microphysiological system for studying contractile differences in young, active, and old, sedentary adult derived skeletal muscle cells
Source: PubMed Central journal article supplement (PMC9282836; doi:10.1111/acel.13650), 2022-06-02
Supplement: ACEL-21-e13650-s001.pdf [file ACEL-21-e13650-s001.pdf]

## Supplemental Material

### Microphysiological system for studying contractile differences in young, active and old, sedentary adult derived skeletal muscle cells

Shelby Giza,<sup>\*a</sup> Jorge A. Mojica-Santiago<sup>\*b</sup>, Maddalena Parafati<sup>a</sup>, LeGrand K. Malany<sup>c</sup>, Don Platt<sup>d</sup>, Christine E. Schmidt<sup>b</sup>, Paul Coen<sup>e</sup> and Siobhan Malany<sup>#a</sup>

<sup>a</sup>Department of Pharmacodynamics, College of Pharmacy, University of Florida, Florida 32610, USA.

<sup>b</sup>J. Crayton Pruitt Family Department of Biomedical Engineering College of Engineering, University of Florida, Gainesville, Florida 32610, USA

<sup>c</sup>Micro-gRx, INC, Orlando, Florida 32935, USA

<sup>d</sup>Micro Areospace Solutions, Melbourne, Florida 32935, USA

<sup>e</sup>Translational Research Institute, AdventHealth, Orlando, Florida 32804, USA

\*Authors contributed equally

<sup>#</sup>Correspondance: Siobhan Malany, Ph.D., Department of Pharmacodynamics, College of Pharmacy, university of Florida, Florida USA. Tel: 407-273-6400, email: [smalany@cop.ufl.edu](mailto:smalany@cop.ufl.edu)

Running Title: Skeletal Muscle Tissue Chip to model Aging

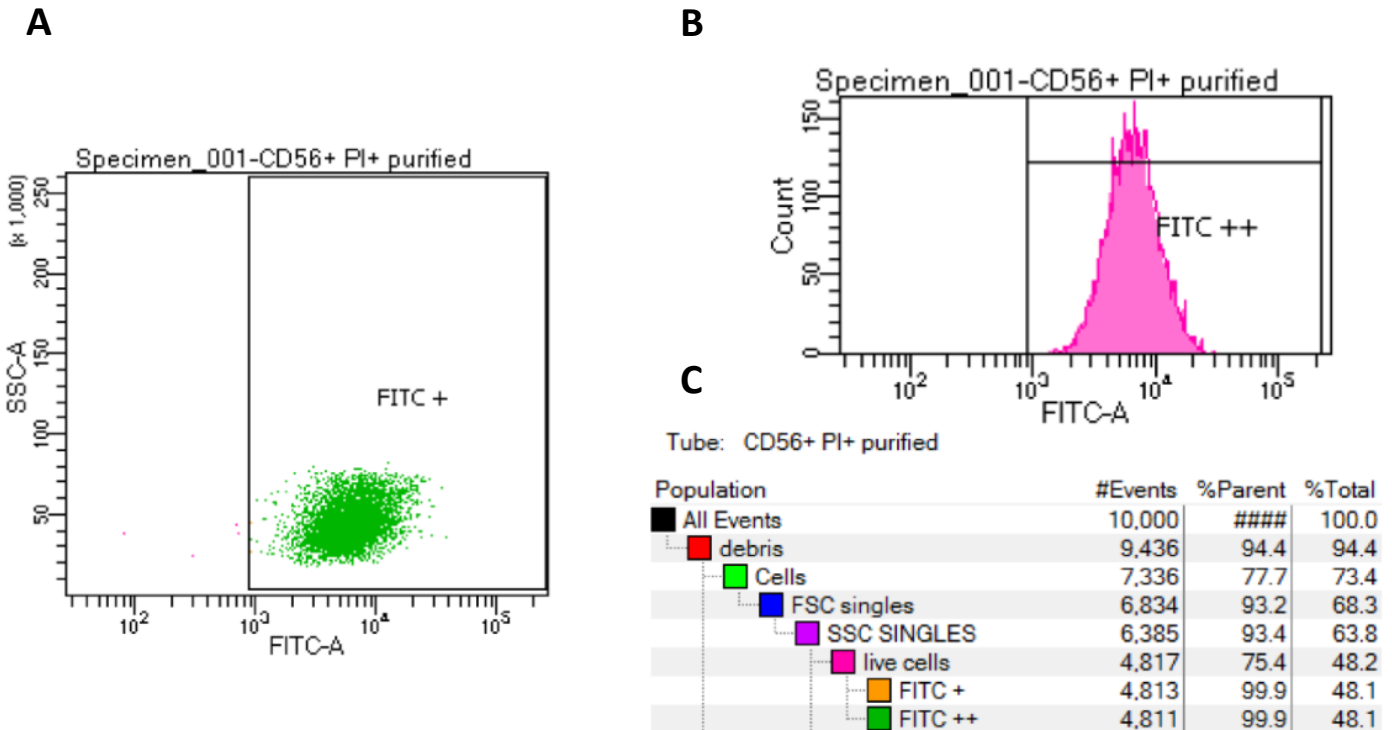

**Figure S1. Isolation and purification of CD56+ Myocytes.**

Stained cells were analyzed on a BD FACSCanto II (BD Biosciences, San Jose, CA) equipped with BD FACSDiva software. A.) Dot-plot shows single subpopulation of cells. B.) histogram shows intensity from single fluorescent channel. C.) Population analysis indicates 99.9% purity for CD56+ population. In brief, purified cells were treated with NA/LE Human Fc Blocker (BD Biosciences, San Jose, CA) to reduce non-specific binding of detection antibodies and incubated on ice with the CD56 antibody clone 5.1H11 prepared in 2% fetal bovine serum in 1X PBS (FACS Buffer) for 30 minutes in the dark. Cells were washed and incubated on ice with a goat anti-mouse IgG (H+L)-Alexa 488 detection antibody prepared in FACS Buffer for 30 minutes in the dark. Cells were washed and stored in 1.5% paraformaldehyde. Specificity of staining was confirmed using a mouse IgG1, kappa-Alexa 488 isotype control antibody.

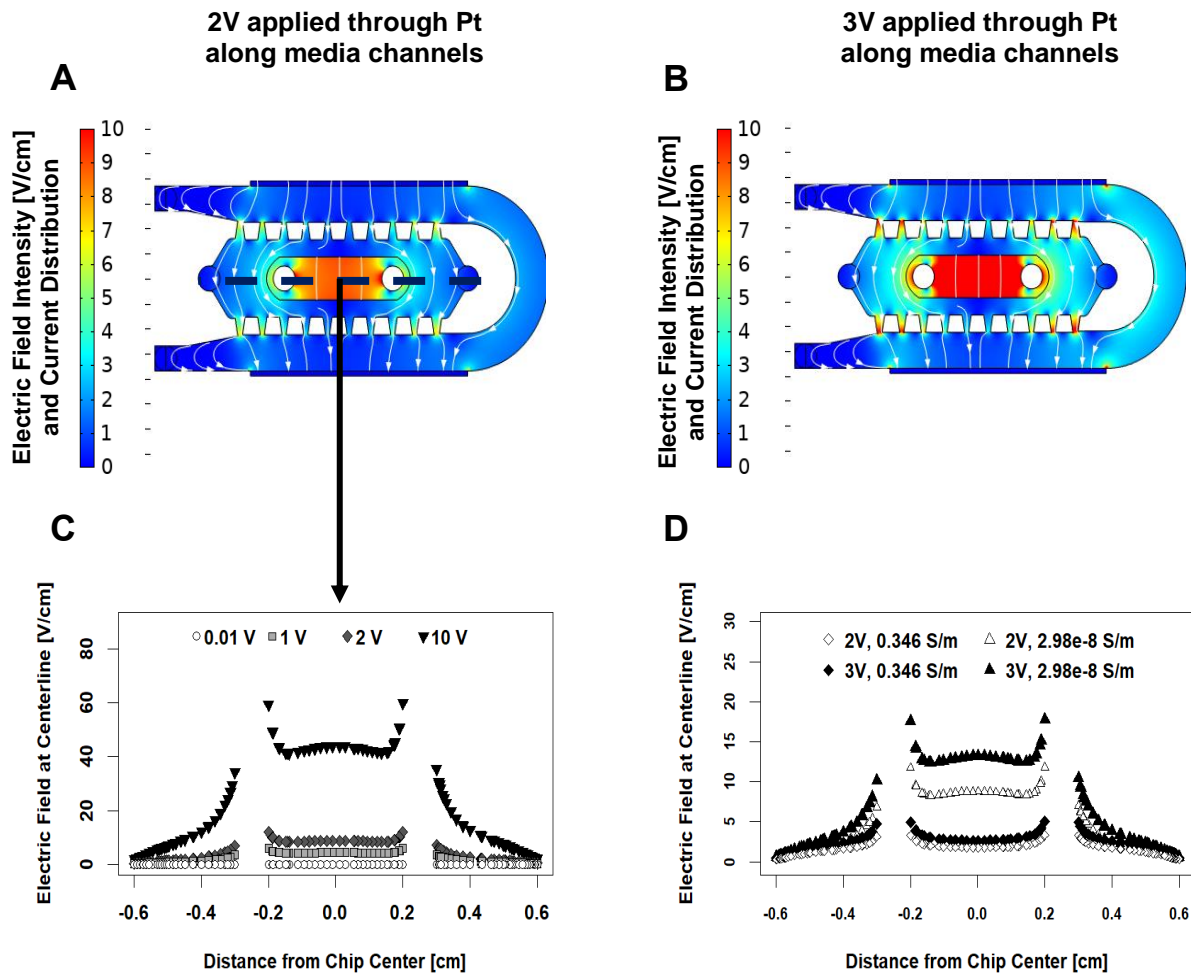

**Figure S2. Finite element simulations to determine optimal electric field intensity in the tissue chips.**

Color maps indicate differences in the electric field intensity between A) 2V and B) 3V. White arrows show a similar distribution of currents via the electrolytic fluid (cell culture medium) throughout the tissue chip. C) Electric field magnitudes that resulted from a sweep of applied voltage between 10mV and 10V were obtained from the centerlines of the tissue chip bundles and plotted as a function of the distance from the chip center (black dotted line and downward arrow in A). D) A closer inspection of simulations when 2V (white symbols) and 3V (black symbols) were applied with (triangles) and without (diamonds) the tissue chip bundles.

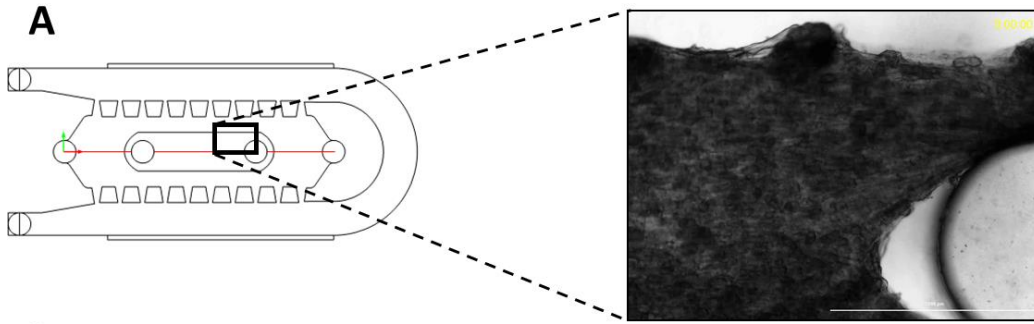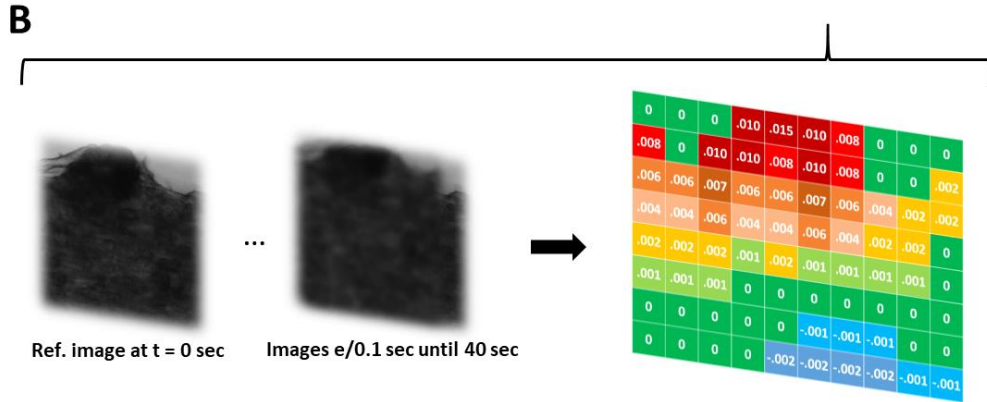

**C** Map of Horizontal Displacement

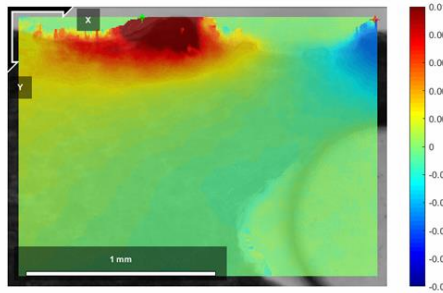

**D** Map of Vertical Displacement

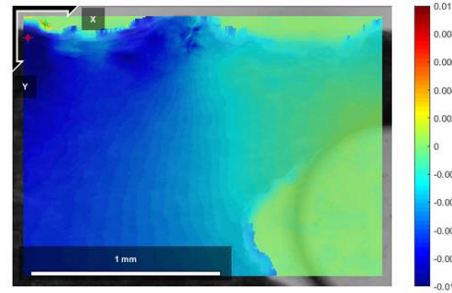

$$\|\delta\| = \sqrt{(\text{pixel location} - \text{reference pixel})_{x\text{-direction}}^2 + (\text{pixel location} - \text{reference pixel})_{y\text{-direction}}^2}$$

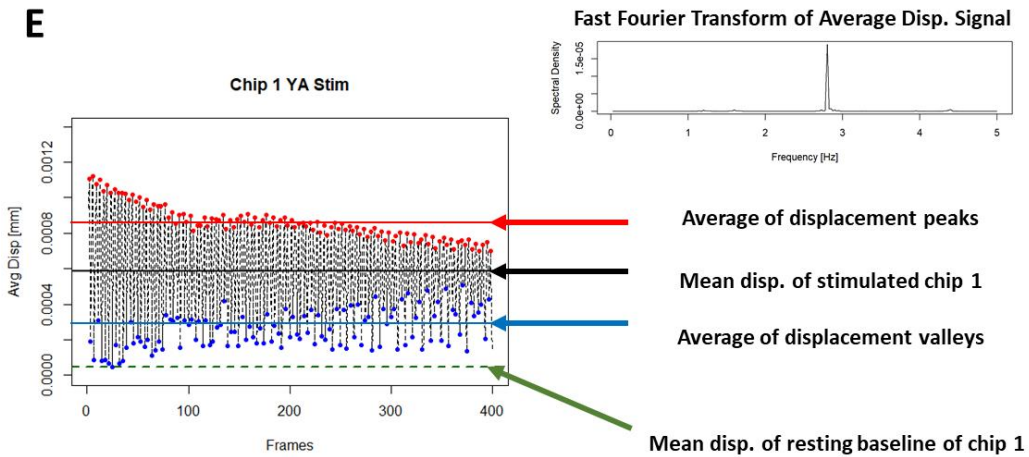

### **Figure S3. Displacement magnitude acquisition**

Workflow of the image analysis used to obtain parameters of contraction from the recorded videos. A) Representative frame indicating the location of a region of interest selected for video recordings of an electrically stimulated myobundle derived from stimulated YA cells. B) Graphic depicting the pixelated image in a sequence of frames from the video were mapped to determine their change in position with respect to a reference image at the beginning of each video, thereby resulting in numerical intensity values (mm) associated to the displacement of each pixel point across the entire region of interest. C) These intensity values were translated to color map plots showing displacements in the axial (horizontal) direction of the myobundle where red pixels correspond to positive contractions from left to right, and D) displacements in the vertical direction of the myobundle where positive contractions are shown from the top to the bottom of the figure (scale bars, 1 mm). The displacements in the axial and vertical components were averaged at each time point to obtain the magnitude of the displacement vector represented as a 40 seconds signal, from which the following parameters were obtained: E) a dominant frequency through a Fast Fourier Transform of the displacement signal, the mean displacement signal of the recorded chip (black), the difference between the average peak displacement (red) and the mean displacement of the signal corresponding to the resting phase of the same chip (green), and the difference between the average valleys in the displacement signal (blue) and the resting phase baseline (green)

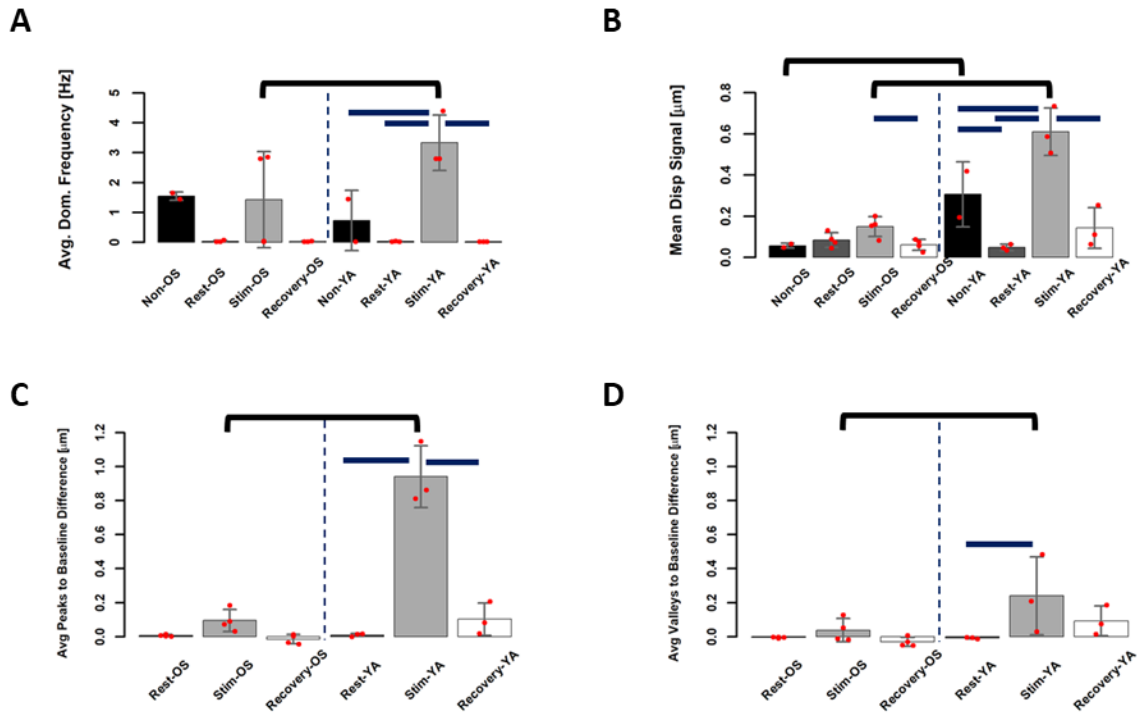

**Figure S4. Displacement contraction analysis for 40 sec recording**

A-D) The dominant frequency, mean displacement, average peaks above the mean displacement of resting baseline, and average valleys relative difference to the mean displacement of said baseline were extracted from this displacement signal (brackets indicate significant differences between OS and YA-derived myobundles, and solid bars show differences between stimulation phases for individual cell groups at  $p < 0.05$ ).

| Range: t = 10-20 sec   |    |          |            |                              |                                 |                                   |
|------------------------|----|----------|------------|------------------------------|---------------------------------|-----------------------------------|
| Sample Cells Treatment |    |          | Freq. (Hz) | Mean Disp. ( $\mu\text{m}$ ) | Peaks to Base ( $\mu\text{m}$ ) | Valleys to Base ( $\mu\text{m}$ ) |
| N = 2                  | YA | Non-S    | 1.16       | $0.13 \pm 0.056$             | N/A                             | N/A                               |
| N = 3                  | YA | Rest     | 0.49       | $0.05 \pm 0.01$              | $0.01 \pm 0.01$                 | $-0.008 \pm 0.006$                |
| N = 3                  | YA | Stim     | 2.78       | $0.64 \pm 0.17$              | $1.00 \pm 0.14$                 | $0.26 \pm 0.27$                   |
| N = 3                  | YA | Recovery | 0.34       | $0.12 \pm 0.08$              | $0.08 \pm 0.09$                 | $0.07 \pm 0.07$                   |
| N = 2                  | OS | Non-S    | 1.07       | $0.051 \pm 0.004$            | N/A                             | N/A                               |
| N = 4                  | OS | Rest     | 0.56       | $0.08 \pm 0.04$              | $0.01 \pm 0.02$                 | $-0.009 \pm 0.008$                |
| N = 4                  | OS | Stim     | 1.67       | $0.15 \pm 0.05$              | $0.10 \pm 0.07$                 | $0.04 \pm 0.07$                   |
| N = 4                  | OS | Recovery | 0.97       | $0.06 \pm 0.02$              | $-0.02 \pm 0.03$                | $-0.04 \pm 0.03$                  |

| Range: t = 0-40 sec |                 |          |            |                              |                                 |                                   |
|---------------------|-----------------|----------|------------|------------------------------|---------------------------------|-----------------------------------|
| Sample              | Cells Treatment |          | Freq. (Hz) | Mean Disp. ( $\mu\text{m}$ ) | Peaks to Base ( $\mu\text{m}$ ) | Valleys to Base ( $\mu\text{m}$ ) |
| N = 2               | YA              | Non-S    | 0.74       | $0.31 \pm 0.16$              | N/A                             | N/A                               |
| N = 3               | YA              | Rest     | 0.03       | $0.05 \pm 0.02$              | $0.01 \pm 0.01$                 | $-0.008 \pm 0.005$                |
| N = 3               | YA              | Stim     | 3.33*      | $0.61 \pm 0.12$              | $0.94 \pm 0.18$                 | $0.24 \pm 0.23$                   |
| N = 3               | YA              | Recovery | 0.03       | $0.14 \pm 0.10$              | $0.10 \pm 0.10$                 | $0.09 \pm 0.09$                   |
| N = 2               | OS              | Non-S    | 1.55       | $0.06 \pm 0.01$              | N/A                             | N/A                               |
| N = 4               | OS              | Rest     | 0.04       | $0.08 \pm 0.04$              | $0.007 \pm 0.006$               | $-0.005 \pm 0.003$                |
| N = 4               | OS              | Stim     | 1.43       | $0.15 \pm 0.05$              | $0.10 \pm 0.06$                 | $0.04 \pm 0.07$                   |
| N = 4               | OS              | Recovery | 0.03       | $0.06 \pm 0.03$              | $-0.02 \pm 0.03$                | $-0.03 \pm 0.03$                  |

**Figure S5. Summary of the parameters extracted from the displacement signal at a subset of the time range (top table) and the full-time range (bottom table).**

N (Number of chips with myobundles); YA (young athletic); OS (old sedentary); Non-S (non-stimulated chips); Rest (chip baseline at resting phase before electrical stimulation); Stim (phase during electrical stimulation); Recovery (recovery phase after electrical stimulation); Freq. (dominant frequency of the peaks in the displacement signal); Mean Disp. (average of the displacement signal); Peaks to Base (average difference between local maxima of displacement signal and resting phase baseline); Valleys to Base (average difference between the local minima of displacement signal and resting phase baseline). \*A dominate peak occurs at 4 Hz due to spontaneous contraction in addition to the peak at 2.8 Hz providing an average of 3.33 Hz.

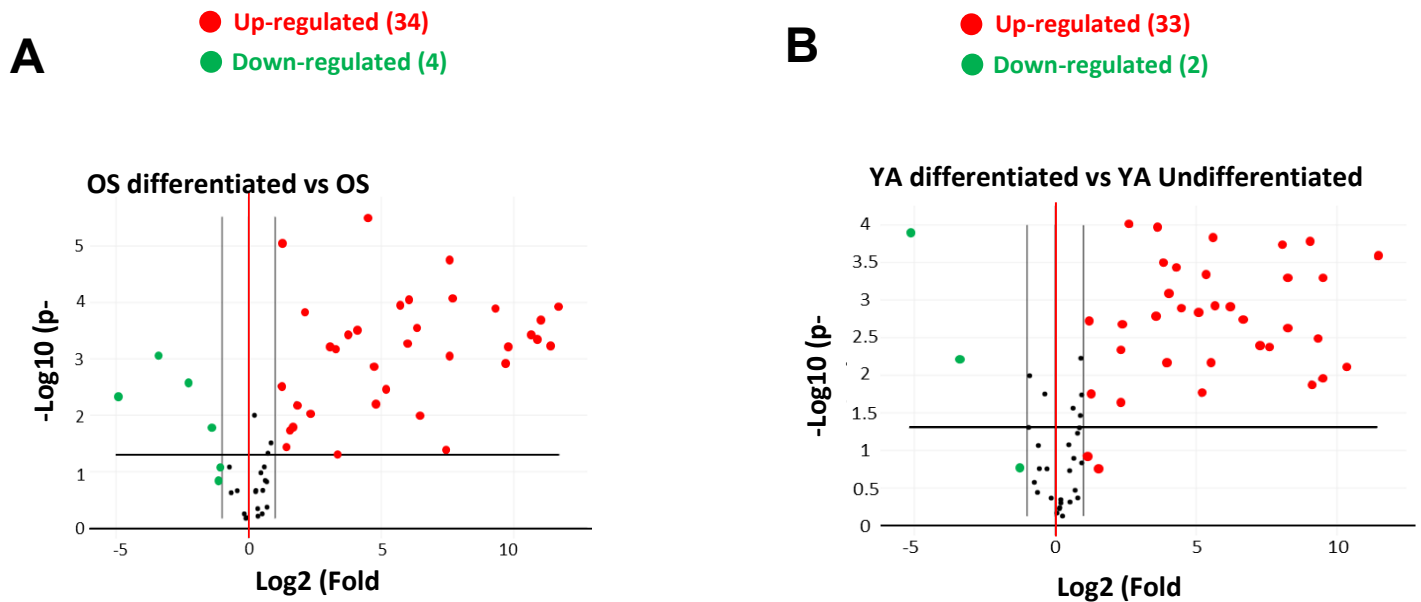

**Figure S6. Differentially expressed genes between the YA and OS cohorts.** Volcano plot visualizing skeletal myogenesis and muscle contractility genes that differed between differentiated OS vs undifferentiated OS (A) and differentiated YA vs undifferentiated YA (B). The x-axis represents the mean of log<sub>2</sub> fold-change (FC) value, and the y-axis corresponds to the negative logarithm of the P-values. The horizontal line represents the level of significance for the t tests performed p-value ≤0.05, and the vertical lines display the threshold set log<sub>2</sub> fold change (FC) ≥2. The red and green circles show genes that were significantly up- or down-regulated and the black circles show genes that were not significantly changed in our 3D contractile skeletal muscle tissues. Genes outside the two black vertical lines are up- or downregulated more than 2-fold. On the y-axis, the  $-\log_{10}$  of the P value is plotted; thus, the higher values indicate stronger statistical evidence of a significant difference in gene expression between YA/OS differentiated vs YA/OS undifferentiated.



| Gene          | YA No EStim |          | OS No EStim |          | YA EStim |          | OS EStim |          |
|---------------|-------------|----------|-------------|----------|----------|----------|----------|----------|
|               | FC          | p Value  | FC          | p Value  | FC       | p Value  | FC       | p Value  |
| <b>ACTA1</b>  | 546.45      | 0.01263  | 1667.97     | 0.000385 | 1009.52  | 0.000031 | 1380.48  | 0.000979 |
| <b>ACTN3</b>  | 147.78      | 0.004    | 60.79       | 0.000519 | 314.43   | 0.001088 | 48.22    | 0.000345 |
| <b>ADRB2</b>  | 5.16        | 0.00208  | 1.45        | 0.214751 | 1.28     | 0.567232 | 1.64     | 0.28641  |
| <b>AGRN</b>   | 1.42        | 0.18557  | 1.28        | 0.615233 | 2.19     | 0.022409 | 1.35     | 0.504966 |
| <b>ATP2A1</b> | 192.09      | 0.004371 | 87.6        | 0.010354 | 547.72   | 0.012655 | 84.71    | 0.000002 |
| <b>BCL2</b>   | 15.13       | 0.007213 | 6.79        | 0.067422 | 14.1     | 0.00472  | 2.64     | 0.584068 |
| <b>BMP4</b>   | 1.74        | 0.427652 | 2.3         | 0.161662 | 2.54     | 0.078551 | 1.51     | 0.097217 |
| <b>CAMK2G</b> | 5.16        | 0.004524 | 3.05        | 0.016751 | 6        | 0.000878 | 3.87     | 0.020168 |
| <b>CAPN2</b>  | 0.52        | 0.049335 | 0.49        | 0.085215 | 0.58     | 0.087115 | 0.54     | 0.121039 |
| <b>CAPN3</b>  | 36.6        | 0.01802  | 27.61       | 0.006046 | 95.02    | 0.009761 | 29.5     | 0.00237  |
| <b>CAST</b>   | 1.11        | 0.594376 | 0.89        | 0.560154 | 1.86     | 0.067026 | 0.99     | 0.908216 |
| <b>CAV1</b>   | 0.09        | 0.005888 | 0.1         | 0.000861 | 0.03     | 0.004639 | 0.12     | 0.000891 |
| <b>CAV3</b>   | 41.17       | 0.000474 | 53.16       | 0.000108 | 69.85    | 0.000131 | 52.6     | 0.000043 |
| <b>CRYAB</b>  | 0.6         | 0.265166 | 0.47        | 0.146318 | 0.69     | 0.436896 | 0.5      | 0.180922 |
| <b>CS</b>     | 1.88        | 0.005939 | 1.8         | 0.030889 | 2.5      | 0.006875 | 1.73     | 0.08515  |
| <b>CTNNB1</b> | 0.91        | 0.429244 | 1.66        | 0.047123 | 2.2      | 0.005644 | 1.23     | 0.495286 |
| <b>DAG1</b>   | 1.86        | 0.034309 | 2.33        | 0.000009 | 2.56     | 0.000908 | 2.33     | 0.035113 |
| <b>DES</b>    | 13.86       | 0.000305 | 17.27       | 0.000299 | 16.44    | 0.000224 | 20.86    | 0.002922 |
| <b>DMD</b>    | 50.38       | 0.001177 | 67.6        | 0.00009  | 62.41    | 0.003875 | 75.19    | 0.000965 |
| <b>DMPK</b>   | 19.13       | 0.000383 | 22.77       | 0.000003 | 18.76    | 0.000218 | 24.71    | 0.000282 |
| <b>DYSF</b>   | 34.15       | 0.001513 | 25.25       | 0.001332 | 41.06    | 0.003734 | 23.41    | 0.010006 |
| <b>HDAC5</b>  | 1.15        | 0.498212 | 1.54        | 0.143538 | 1.54     | 0.012179 | 1.7      | 0.039599 |

|                |         |          |         |          |         |          |         |          |
|----------------|---------|----------|---------|----------|---------|----------|---------|----------|
| <b>HK2</b>     | 0.66    | 0.085875 | 0.74    | 0.217708 | 0.62    | 0.287228 | 0.62    | 0.307599 |
| <b>IGF1</b>    | 2.08    | 0.116939 | 2.71    | 0.036122 | 3.72    | 0.047994 | 2.98    | 0.104289 |
| <b>IGFBP3</b>  | 0.42    | 0.168032 | 0.21    | 0.002542 | 0.38    | 0.031588 | 0.27    | 0.003601 |
| <b>IGFBP5</b>  | 46.54   | 0.007061 | 36.45   | 0.003414 | 80.65   | 0.001717 | 35.07   | 0.024072 |
| <b>IKBKB</b>   | 1.81    | 0.049902 | 1.51    | 0.082492 | 2.6     | 0.012081 | 1.73    | 0.042213 |
| <b>LMNA</b>    | 0.68    | 0.174435 | 1.27    | 0.453218 | 1.96    | 0.092498 | 1.01    | 0.982001 |
| <b>MAPK1</b>   | 1.58    | 0.127062 | 1.61    | 0.151176 | 0.89    | 0.579851 | 1.61    | 0.147584 |
| <b>MB</b>      | 682.55  | 0.011198 | 173.37  | 0.044008 | 1775.22 | 0.000631 | 181.94  | 0.000019 |
| <b>MEF2C</b>   | 47.34   | 0.000151 | 81.09   | 0.000285 | 59.11   | 0.012462 | 73.52   | 0.00112  |
| <b>MSTN</b>    | 16.08   | 0.000788 | 8.98    | 0.000629 | 39.5    | 0.000047 | 7.64    | 0.062875 |
| <b>MUSK</b>    | 1.63    | 0.337981 | 2.98    | 0.017287 | 2.01    | 0.056947 | 1.86    | 0.147048 |
| <b>MYF5</b>    | 0.03    | 0.000125 | 0.03    | 0.004836 | 0.07    | 0.000163 | 0.04    | 0.005708 |
| <b>MYF6</b>    | 6.36    | 0.000101 | 4.35    | 0.000149 | 7.93    | 0.000028 | 3.11    | 0.009766 |
| <b>MYH1</b>    | 1269.86 | 0.007972 | 3363.41 | 0.000118 | 1066.46 | 0.002764 | 2517.22 | 0.000281 |
| <b>MYH2</b>    | 74.15   | 0.001239 | 192.03  | 0.000859 | 145.54  | 0.039158 | 141.37  | 0.000038 |
| <b>MYOD1</b>   | 12.15   | 0.000114 | 14.15   | 0.00037  | 13.73   | 0.006482 | 15.47   | 0.010582 |
| <b>MYOG</b>    | 99.61   | 0.001853 | 614.26  | 0.000124 | 137.87  | 0.010748 | 550.51  | 0.000667 |
| <b>MYOT</b>    | 268.07  | 0.000188 | 189.5   | 0.000018 | 210.69  | 0.001416 | 170.91  | 0.000388 |
| <b>NEB</b>     | 642.68  | 0.003262 | 2041.91 | 0.000195 | 803.85  | 0.004263 | 1587.03 | 0.00425  |
| <b>PAX3</b>    | 1.44    | 0.48429  | 1.43    | 0.55943  | 1.52    | 0.428281 | 2.01    | 0.12934  |
| <b>PAX7</b>    | 0.89    | 0.607706 | 1.25    | 0.827224 | 1.51    | 0.7125   | 1.24    | 0.754623 |
| <b>PDK4</b>    | 2.87    | 0.167902 | 0.37    | 0.016949 | 4.4     | 0.114709 | 0.21    | 0.010162 |
| <b>PPP3CA</b>  | 1.15    | 0.451153 | 1.21    | 0.216195 | 1.62    | 0.010968 | 1.24    | 0.208169 |
| <b>RHOA</b>    | 0.77    | 0.017737 | 1.2     | 0.22603  | 0.93    | 0.634339 | 1.09    | 0.473666 |
| <b>RPS6KB1</b> | 2.26    | 0.001956 | 2.26    | 0.003044 | 3.55    | 0.01519  | 2.25    | 0.015407 |

|               |        |          |         |          |         |          |         |          |
|---------------|--------|----------|---------|----------|---------|----------|---------|----------|
| <b>SGCA</b>   | 2.37   | 0.017339 | 3.49    | 0.006224 | 3.3     | 0.004231 | 3.12    | 0.003581 |
| <b>SLC2A4</b> | 23.19  | 0.001256 | 10.13   | 0.048677 | 32.7    | 0.070305 | 15.86   | 0.020883 |
| <b>TNNC1</b>  | 536.69 | 0.000175 | 809.12  | 0.001183 | 680.11  | 0.001501 | 789.4   | 0.001708 |
| <b>TNNI2</b>  | 2724.2 | 0.000273 | 1848.8  | 0.000419 | 5702.12 | 0.003553 | 1516.59 | 0.000603 |
| <b>TNNT1</b>  | 306.3  | 0.000522 | 213.34  | 0.000083 | 469.65  | 0.008944 | 201.75  | 0.003249 |
| <b>TNNT3</b>  | 714.25 | 0.000504 | 2627.01 | 0.000579 | 1306.01 | 0.001316 | 2928.51 | 0.001745 |
| <b>TTN</b>    | 307.71 | 0.002489 | 870.81  | 0.000601 | 309.85  | 0.002942 | 626.98  | 0.001489 |
| <b>UTRN</b>   | 4.93   | 0.024306 | 4.82    | 0.009205 | 7.51    | 0.001765 | 5.22    | 0.029636 |

**Figure S7: Gene expression differences between differentiated (No E-Stim and E-Stim) vs undifferentiated cohorts.** Average fold-change (FC) for each gene that has been calculated by averaging (geometric mean) the fold difference (ratio) of relative mRNA expression across all the samples in YA or OS differentiated myobundles compared to YA or OS myoblasts, respectively. Therefore, values higher than 1 indicate up-regulation while values lower than 1 indicate down-regulation. P-values correspond to student t-test of replicate raw Ct data between the relative mRNA expression in the differentiated YA and OS cohort compared to undifferentiated YA and OS, respectively.

**A****Up-regulated**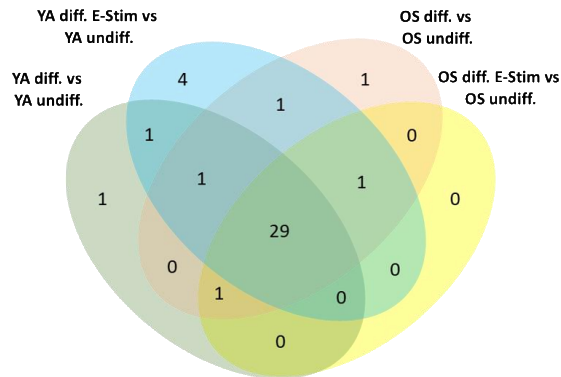**B****Down-regulated**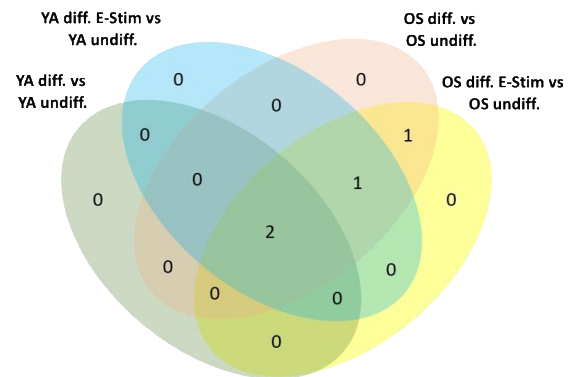

**Figure S8. Venn Diagram illustrating the results of A) up- and B) down-regulated differential gene expression analysis (YA vs OS) in various groups of samples: YA E-Stim, YA no E-Stim, OS E-Stim, OS no E-Stim. In Venn diagrams, we included the numbers of shared and specific DEGs between groups that passed thresholds: fold change > 2 and with  $p < 0.05$ .**

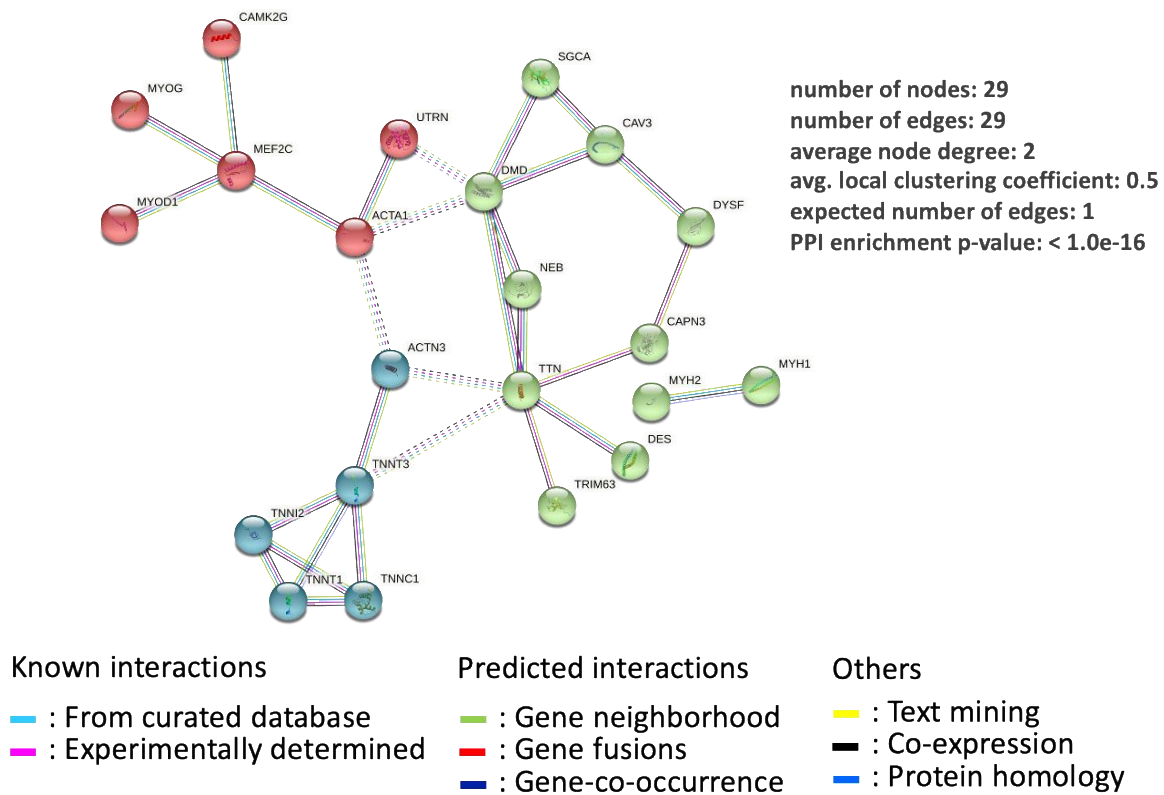

**Figure S9. Protein interaction networks generated based on DEG in YA and OS derived myobundles.** Protein interaction networks, generated using STRING database analysis tool (<https://string-db.org/>) for the top 29 genes that were substantially overexpressed YA and OS derived myobundles with or without E-Stim, identified 3 clusters shown in red, green and blue. Only proteins with at least one interaction are shown. Subcellular localization and biological process are annotated. We applied the KMEANS clustering algorithm to cluster the proteins displayed in the network.

## Gene ontology

| <b>Biological process</b> |                                     |                             |
|---------------------------|-------------------------------------|-----------------------------|
| <b>GO-term</b>            | <b>description</b>                  | <b>false discovery rate</b> |
| GO:0003012                | muscle system process               | 1.13E-34                    |
| GO:0006936                | muscle contraction                  | 2.01 e-27                   |
| GO:0030049                | muscle filament sliding             | 1.39 e-18                   |
| GO:0090257                | regulation of muscle system process | 4.58 e-18                   |
| GO:0043502                | actin mediated cell contraction     | 2.85 e-17                   |
| <b>Molecular function</b> |                                     |                             |
| <b>GO-term</b>            | <b>description</b>                  | <b>false discovery rate</b> |
| GO:0008092                | cytoskeletal protein binding        | 4.30 e-13                   |
| GO:0008307                | structural constituent of muscle    | 2.12 e-7                    |
| GO:0003779                | actin binding                       | 8.35 e-7                    |
| GO:0005515                | protein binding                     | 4.45 e-5                    |
| GO:0031014                | troponin T binding                  | 0.00011                     |
| <b>Cellular component</b> |                                     |                             |
| <b>GO-term</b>            | <b>description</b>                  | <b>false discovery rate</b> |
| GO:0030016                | myofibril                           | 2.65 e-22                   |
| GO:0030017                | sarcomere                           | 2.24 e-21                   |
| GO:0099512                | supramolecular fiber                | 8.10 e-16                   |
| GO:0031674                | I band                              | 2.47 e-10                   |
| GO:00015629               | actin ctoskeleton                   | 5.53 e-10                   |

**Figure S10. Top GO terms identified based on DEG in YA and OS derived myobundles with or without E-stim.** GO terms for biological process, molecular function and cellular component are listed.
